# Supplementary material for: The Impact of a Commercial Biostimulant on the Grape Mycobiota of Vitis vinifera cv. Barbera
Source: MDPI journal article supplement (doi:10.3390/microorganisms11081873), 2023-07-25
Supplement: s1 [file s1]

**Table S1. Alpha biodiversity data.** Recorded data of the alpha biodiversity in terms of number of observed species, Shannon's and Simpson's index, as output from MicrobiomeAnalyst. In bold type are highlighted the median values.

| Thesis      | sample  | Species Observed<br>(p = 0,049894) | Shannon's Index<br>(p = 0,73345) | Simpson's Index<br>(p = 0,56553) |
|-------------|---------|------------------------------------|----------------------------------|----------------------------------|
| Control (C) | R3P18C  | 65                                 | 1,14                             | 0,558                            |
|             | R5P8C   | <b>79</b>                          | <b>1,41</b>                      | 0,637                            |
|             | R6P11C  | 93                                 | 1,67                             | 0,646                            |
|             | R7P13C  | 84                                 | 1,45                             | <b>0,606</b>                     |
|             | R8P1C   | 63                                 | 1,05                             | 0,503                            |
| Bion (B)    | R9P3B   | <b>83</b>                          | 1,11                             | 0,455                            |
|             | R9P11B  | 86                                 | 1,59                             | <b>0,618</b>                     |
|             | R10P6B  | 94                                 | 1,30                             | 0,543                            |
|             | R10P16B | 69                                 | 1,61                             | 0,699                            |
|             | R11P7B  | 75                                 | <b>1,53</b>                      | 0,713                            |
| Water (W)   | R13P6W  | 57                                 | 1,41                             | 0,696                            |
|             | R13P13W | 51                                 | <b>1,44</b>                      | <b>0,667</b>                     |
|             | R13P23W | <b>60</b>                          | 1,49                             | 0,688                            |
|             | R14P9W  | 83                                 | 1,51                             | 0,604                            |
|             | R14P17W | 62                                 | 1,39                             | 0,586                            |

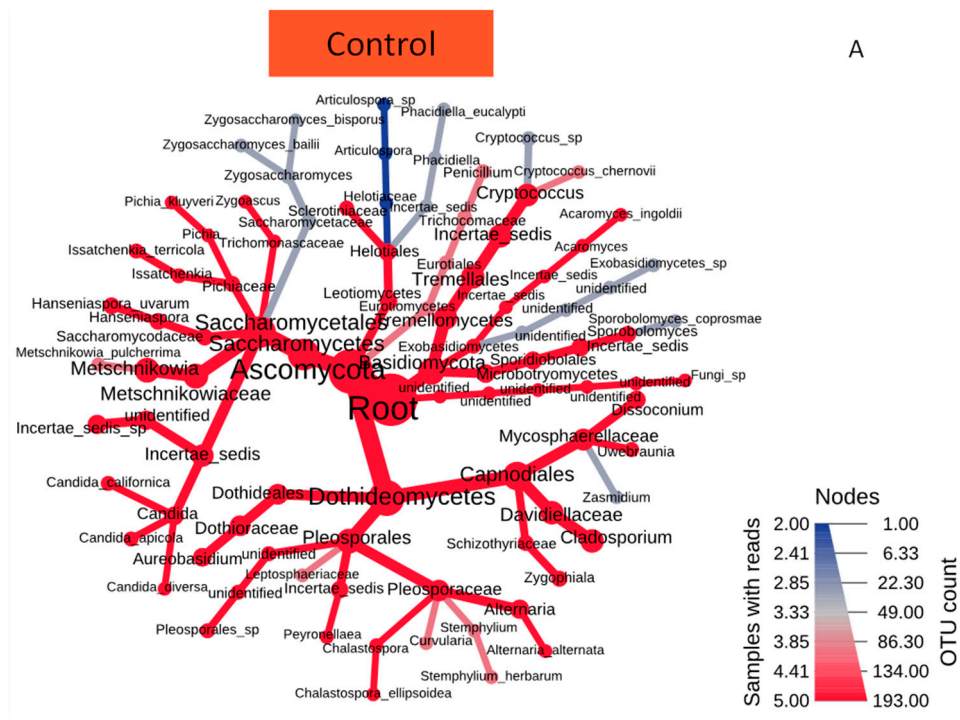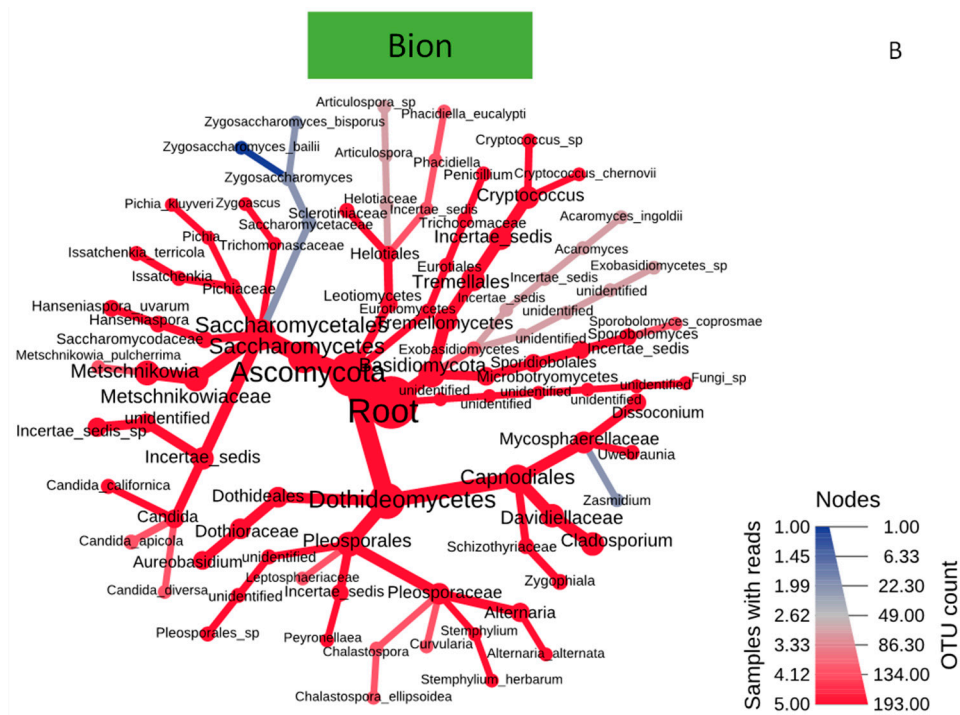



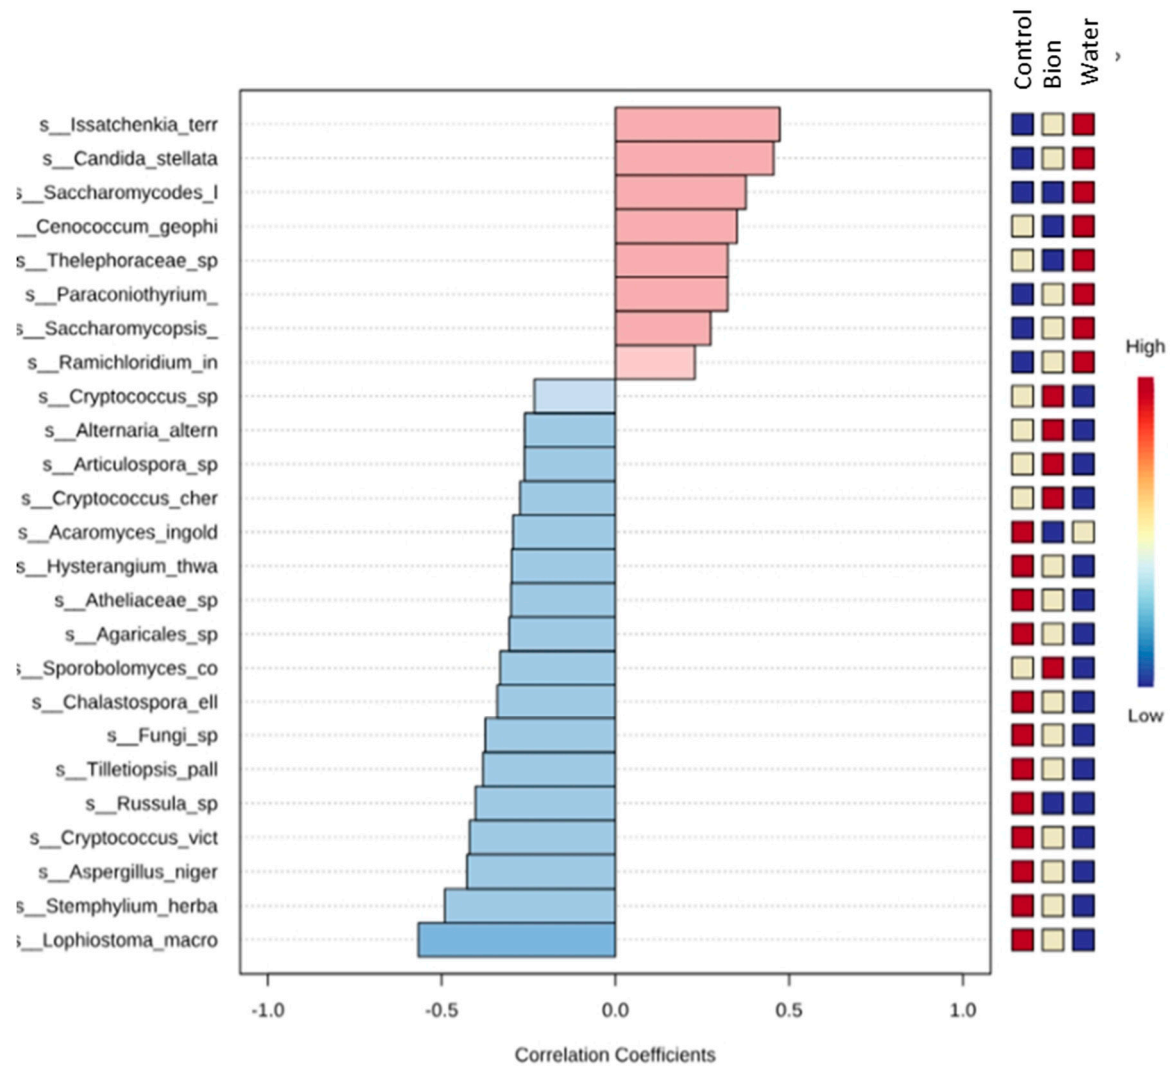

Figure S2. Correlation coefficients. Top 25 OTUs have been correlated with the three treatments.

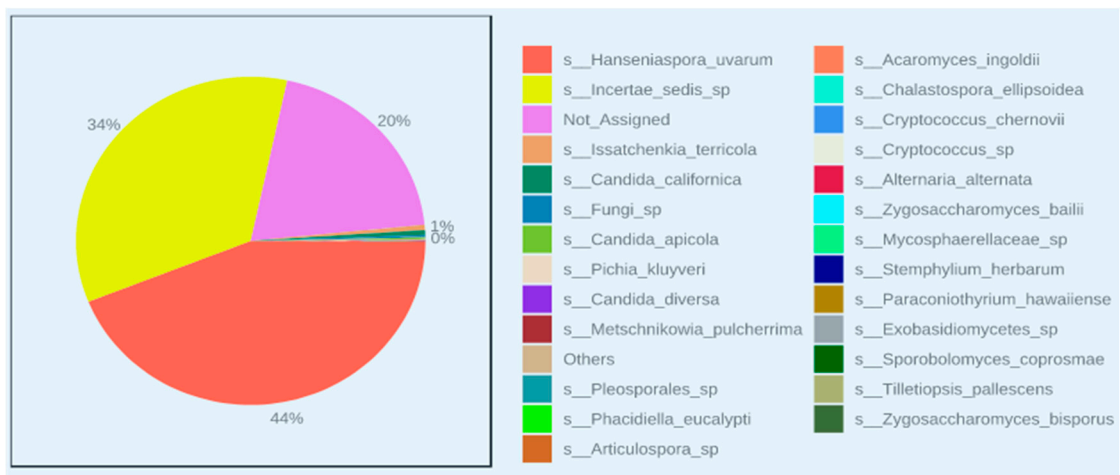

Control

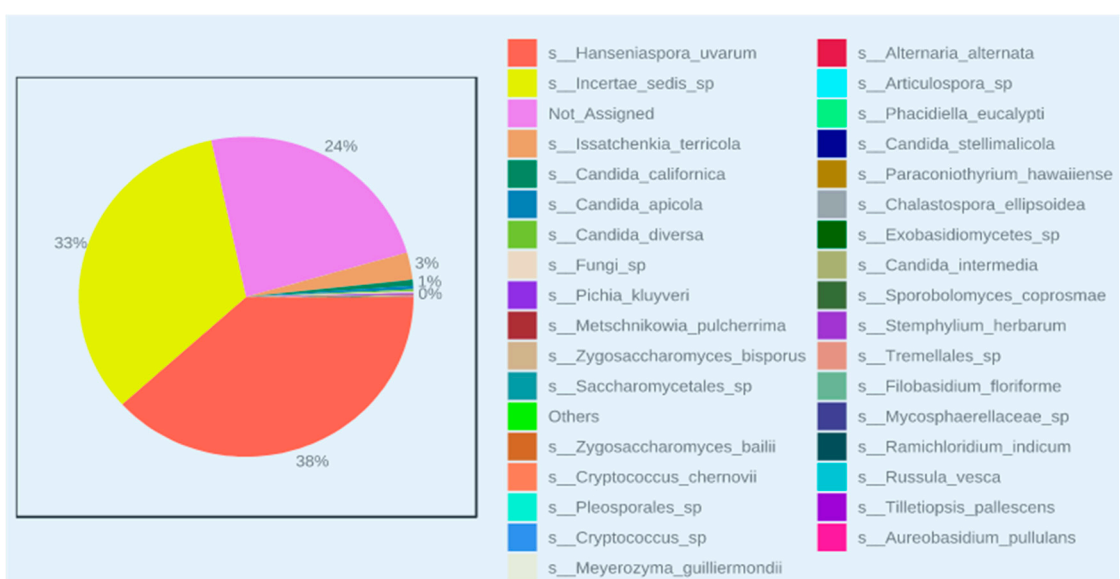

Bion

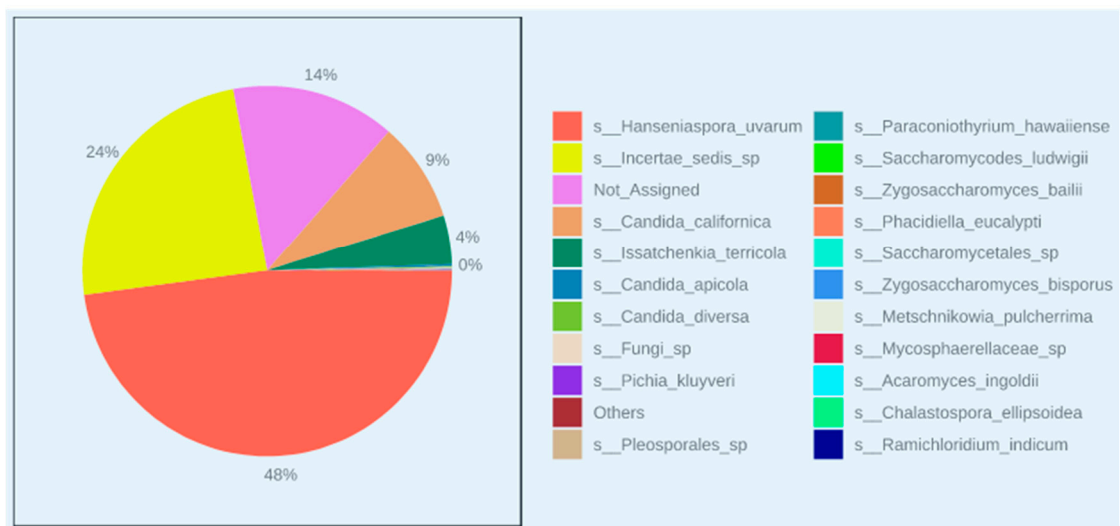

Water

**Figure S3. Pie-Chart of relative abundance at species level.** Relative abundance in percentage of the species detected in each thesis.
